## REVIEW

# Established and potential physiological roles of bicarbonate-sensing soluble adenylyl cyclase (sAC) in aquatic animals

Martin Tresguerres\*, Katie L. Barott, Megan E. Barron and Jinae N. Roa

**ABSTRACT**

Soluble adenylyl cyclase (sAC) is a recently recognized source of the signaling molecule cyclic AMP (cAMP) that is genetically and biochemically distinct from the classic G-protein-regulated transmembrane adenylyl cyclases (tmACs). Mammalian sAC is distributed throughout the cytoplasm and it may be present in the nucleus and inside mitochondria. sAC activity is directly stimulated by  $\text{HCO}_3^-$ , and sAC has been confirmed to be a  $\text{HCO}_3^-$  sensor in a variety of mammalian cell types. In addition, sAC can functionally associate with carbonic anhydrases to act as a *de facto* sensor of pH and  $\text{CO}_2$ . The two catalytic domains of sAC are related to  $\text{HCO}_3^-$ -regulated adenylyl cyclases from cyanobacteria, suggesting the cAMP pathway is an evolutionarily conserved mechanism for sensing  $\text{CO}_2$  levels and/or acid/base conditions. Reports of sAC in aquatic animals are still limited but are rapidly accumulating. In shark gills, sAC senses blood alkalosis and triggers compensatory  $\text{H}^+$  absorption. In the intestine of bony fishes, sAC modulates NaCl and water absorption. And in sea urchin sperm, sAC may participate in the initiation of flagellar movement and in the acrosome reaction. Bioinformatics and RT-PCR results reveal that sAC orthologs are present in most animal phyla. This review summarizes the current knowledge on the physiological roles of sAC in aquatic animals and suggests additional functions in which sAC may be involved.

**KEY WORDS:** V-ATPase, Acid/base, cAMP, Carbonic anhydrase, pH sensing, Proton pump

**Introduction**

Cyclic adenosine monophosphate (cAMP) is the signaling molecule of one of the most versatile and evolutionarily conserved signaling pathways. cAMP is produced by adenylyl cyclase enzymes that use ATP as substrate. There are six different classes of adenylyl cyclases distributed throughout Bacteria, Archaea and Eukarya; these classes are unrelated in sequence and structure but all produce cAMP as a result of convergent evolution (Linder and Schultz, 2008). All known eukaryotic adenylyl cyclases, including soluble adenylyl cyclase (sAC) and transmembrane adenylyl cyclase (tmAC) from animals, belong to Class III.

**Discovery of mammalian sAC**

Until recently, vertebrate animals were believed to have only one type of adenylyl cyclase, a family of hormone and G-protein-regulated tmACs. Mammals have nine tmAC genes (ADCY1–9), which differ in their tissue and developmental expression as well as in some of their regulatory properties (Cooper, 2003; Hanoune and Defer, 2001). A genetically unrelated, novel adenylyl cyclase (ADCY10) was recently identified by Levin and Buck (Buck et al.,

1999; Chen et al., 2000), following on from earlier reports of  $\text{Mn}^{2+}$ -stimulated cAMP activity in rat testis homogenates (Braun, 1974; Braun, 1975; Braun, 1990; Braun, 1991; Braun and Dods, 1975). This enzyme was termed ‘soluble adenylyl cyclase’ (sAC) because its activity is preferentially found in the cytosolic fraction, although some activity is also found associated with membranes. Subsequent immunolocalization and biochemical studies found sAC in the cell cytoplasm and in organelles (Zippin et al., 2003; Zippin et al., 2004). The intracellular localization of sAC changed the assumption that cAMP is produced exclusively in the proximity of the cell membrane by tmACs. Production of cAMP in various focal points within cells supports the model of cAMP-signaling microdomains (Fig. 1), which entails tmACs and sAC as sources of cAMP, phosphodiesterases (PDEs) as barriers for cAMP diffusion, and the cAMP-activated targets protein kinase A (PKA), cyclic nucleotide-gated channels and exchange protein activated by cAMP (EPAC) (reviewed in Cooper, 2003; Tresguerres et al., 2011; Zaccolo, 2009; Zaccolo et al., 2006). The most widely studied cAMP effector is PKA, which modulates the activity of multiple downstream proteins by phosphorylation. PKA and PDE are tethered to specific intracellular compartments by A-kinase anchoring proteins (AKAPs), which also coordinate PKA and PDE activities, thus allowing the spatio-temporal dynamics of cAMP signaling (reviewed in Wong and Scott, 2004). The cAMP-signaling microdomain model has changed the cAMP-signaling paradigm and causing researchers to revisit previous studies on signal transduction pathways.

The paramount feature of sAC is direct stimulation by  $\text{HCO}_3^-$  to produce cAMP, turning sAC into a putative physiological acid/base (A/B) sensor (Chen et al., 2000). The molecular mechanism of  $\text{HCO}_3^-$  stimulation has been elucidated for CyaC, a cyanobacterial adenylyl cyclase related to sAC (Steebhorn et al., 2005b); this mechanism is believed to also apply to mammalian sAC (reviewed in Kamenetsky et al., 2006; Tresguerres et al., 2011). Briefly,  $\text{HCO}_3^-$  induces an allosteric change that results in an increase in the  $V_{\text{max}}$  of sAC without changing its  $K_m$  for substrate ATP. The stimulatory effect of  $\text{HCO}_3^-$  on sAC and sAC-like enzymes is strictly dependent on a specific amino acid residue that is a threonine in mammals and a serine in bacteria and mollusks. In contrast, the corresponding residue in tmACs, which are not stimulated by  $\text{HCO}_3^-$ , is an aspartate (Linder, 2006; Steebhorn et al., 2005b).

There are several other biochemical differences between mammalian sAC and tmACs. While tmAC activity is modulated by heterotrimeric G-proteins, sAC is unresponsive. Most tmAC isoforms are stimulated by low micromolar  $[\text{Ca}^{2+}]$  via calmodulin (Wang and Storm, 2003; Willoughby and Cooper, 2007), but inhibited by millimolar  $[\text{Ca}^{2+}]$ , which displaces the cofactor  $\text{Mg}^{2+}$  from the active site (Guillou et al., 1999). In contrast, mammalian sAC (but not necessarily sACs from other organisms, see below) is stimulated by millimolar  $[\text{Ca}^{2+}]$ , which lowers sAC  $K_m$  for ATP (Jaiswal and Conti, 2003; Litvin et al., 2003); mammalian sAC is additionally insensitive

Marine Biology Research Division, Scripps Institution of Oceanography, University of California San Diego, 9500 Gilman Drive, La Jolla, CA 92093, USA.

\*Author for correspondence (mtresguerres@ucsd.edu)

**List of abbreviations**

|                   |                                                                 |
|-------------------|-----------------------------------------------------------------|
| A/B               | acid/base                                                       |
| AC                | adenylyl cyclase                                                |
| AKAP              | A-kinase anchoring protein                                      |
| CA                | carbonic anhydrase                                              |
| cAMP              | cyclic AMP                                                      |
| CFTR              | cystic fibrosis transmembrane conductance regulator             |
| CyaC              | cyanobacterial AC                                               |
| EPAC              | exchange protein activated by cAMP                              |
| EST               | expressed sequence tag                                          |
| GPCR              | G-protein-coupled receptor                                      |
| NBC               | sodium/bicarbonate cotransporter                                |
| NHE               | Na <sup>+</sup> /H <sup>+</sup> exchanger                       |
| NKCC              | Na <sup>+</sup> /K <sup>+</sup> /2Cl <sup>-</sup> cotransporter |
| PDE               | phosphodiesterase                                               |
| PKA               | protein kinase A                                                |
| sAC               | soluble adenylyl cyclase                                        |
| sAC <sub>FL</sub> | full-length sAC                                                 |
| sAC <sub>T</sub>  | truncated sAC                                                   |
| tmAC              | transmembrane AC                                                |
| TSA               | transcriptome shotgun assemblies                                |
| WGS               | whole genome shotgun                                            |

to calmodulin. Most tmACs are potently activated by forskolin, a plant dipertene that has been classically used to study cAMP function *in vivo* (Seamon and Daly, 1981; Seamon et al., 1981); however, sAC is insensitive to forskolin (Buck et al., 1999). Mammalian sAC and tmACs also display differential sensitivity to the pharmacological antagonists KH7 and derivatives of catechol estrogen (selective for sAC), and 'p-site' inhibitors such as 2',5'-dideoxyadenosine (selective for tmAC) (Tresguerres et al., 2011).

Mammalian sAC is composed of two catalytic domains in the N-terminus (~50 kDa), and a C-terminus domain with mostly unknown regulatory functions (~140 kDa) (Buck et al., 1999; Chen et al., 2000). Some mammals have multiple sAC genes (e.g. dog, bonobo), while humans have a single sAC gene and one pseudo gene. Human sAC mRNA undergoes extensive alternative splicing (Farrell et al., 2008; Geng et al., 2005; Jaiswal and Conti, 2001; Moore et al., 2008). The better-characterized human sAC splice variant, termed

'truncated sAC' (sAC<sub>T</sub>), is essentially composed of just the two catalytic domains and is ~10-fold more active than full-length sAC (sAC<sub>FL</sub>) (reflected as a higher  $V_{max}$ ) (Buck et al., 1999). Most of the difference in specific activity is due to a nine amino acid auto-inhibitory domain located C-terminal to the second catalytic domain (Chaloupka et al., 2006). However, the half-maximum stimulation (EC<sub>50</sub>) for HCO<sub>3</sub><sup>-</sup> and the  $K_m$  for Mg<sup>2+</sup>, Mn<sup>2+</sup> and Ca<sup>2+</sup> of sAC<sub>T</sub>, sAC<sub>FL</sub> and other splice variants are indistinguishable from each other (Chaloupka et al., 2006; Geng et al., 2005), indicating that these parameters are exclusively determined by residues in the two catalytic domains.

Studies on sAC have been challenging because of the intrinsic complexity of sAC and methodological issues. Among the former is that sAC mRNA abundance is typically very low in cells, with the exception of testes bearing maturing sperm (Buck et al., 1999; Farrell et al., 2008; Geng et al., 2005). This trend seems to apply to all vertebrate animals but not necessarily to invertebrates. The low sAC mRNA abundance only implies a low protein turnover rate but it does not preclude robust expression. However, it complicates detection of sAC by RT-PCR and makes it almost impossible to use degenerate PCR to clone sAC from species lacking a sequenced genome (e.g. Tresguerres et al., 2010b). One important methodological issue is that sAC rapidly loses its activity after more than one freeze/thaw cycle (Barott et al., 2013), and that the activity assay conditions that sustain HCO<sub>3</sub><sup>-</sup> stimulation are not universal among species, especially when it comes to the required catalytic metals (Mg<sup>2+</sup>, Mn<sup>2+</sup>, Ca<sup>2+</sup>). Also, the initial studies on sAC were impaired by the lack of pharmacological inhibitors specific for sAC. However, KH7 and derivatives of catechol estrogen are now proving to be effective against sACs from cyanobacteria (Steebom et al., 2005a), coral (Barott et al., 2013), sea urchin (Beltrán et al., 2007), shark (Tresguerres et al., 2010c) and mammals (Hess et al., 2005; Pastor-Soler et al., 2003).

**Mechanisms of sAC activation *in vivo***

The *in vitro* activity of sAC is specifically modulated by [HCO<sub>3</sub><sup>-</sup>] and not by pH or CO<sub>2</sub> (Chen et al., 2000; Tresguerres et al., 2010c).

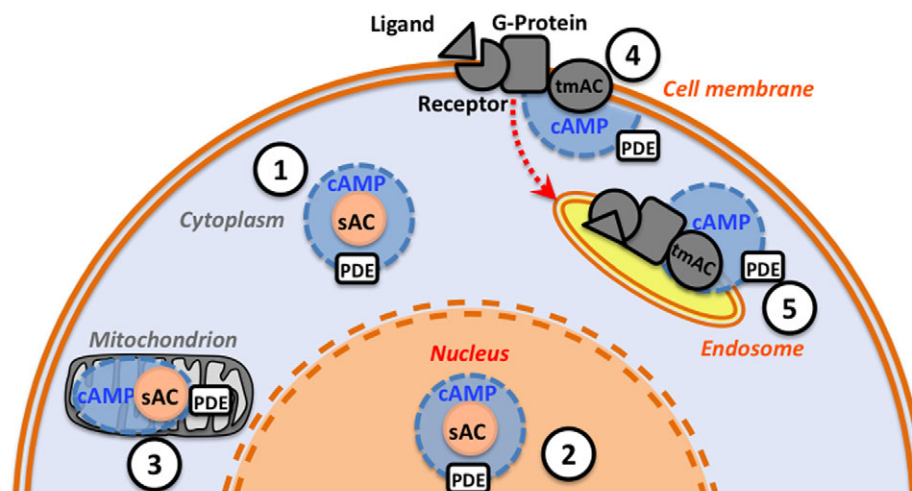

**Fig. 1. Intracellular cAMP-signaling microdomains.** cAMP production may occur in discrete intracellular compartments such as (1) focal points throughout the cytoplasm, (2) the nucleus, (3) mitochondria, (4) the cell membrane vicinity and (5) internalized endosomes. Additional regulation might involve the movement of soluble adenylyl cyclase (sAC) between compartments (not shown). Each microdomain contains a source of cAMP [sAC or transmembrane adenylyl cyclase (tmAC)]; phosphodiesterases (PDEs) that degrade cAMP, thus acting as barriers for cAMP diffusion; and cAMP targets such as protein kinase A (PKA) or exchange protein activated by cAMP (EPAC) (not depicted). Production of cAMP by sAC is stimulated by increased [HCO<sub>3</sub><sup>-</sup>] (and in some cases Ca<sup>2+</sup>, see 'Discovery of mammalian sAC' and Fig. 2 for details). Production of cAMP by tmAC occurs in response to various extracellular ligands and it requires modulation by G-protein-coupled receptors and G-protein.

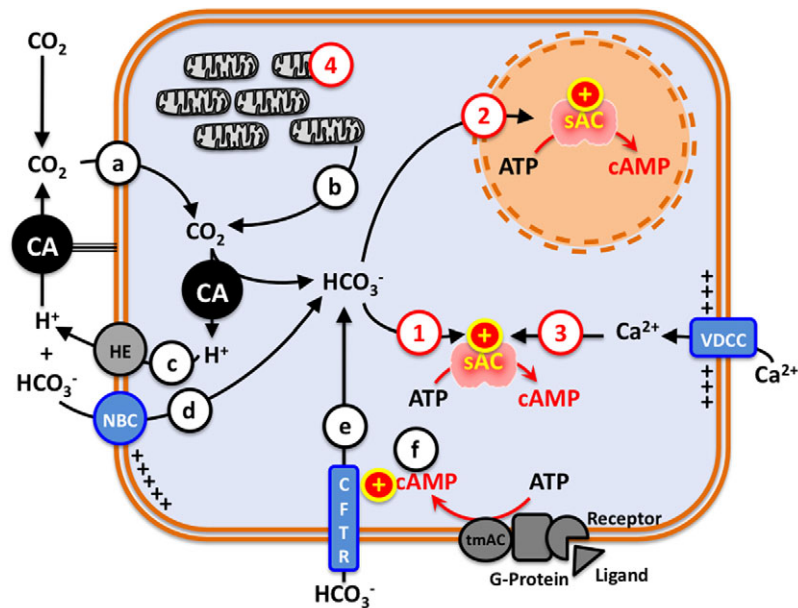

**Fig. 2. Mechanisms of sAC activation *in vivo*.** (1) sAC in the cytoplasm can be stimulated by HCO<sub>3</sub><sup>-</sup> from various sources. (a) Carbonic anhydrase (CA)-dependent hydration of external CO<sub>2</sub>. (b) CA-dependent hydration of metabolic CO<sub>2</sub>. (c) H<sup>+</sup>-extruding transporters (HE) such as V-type H<sup>+</sup>-ATPase or Na<sup>+</sup>/H<sup>+</sup> exchangers from the cell may prevent slowing down of the CO<sub>2</sub> hydration reaction. (d,e) HCO<sub>3</sub><sup>-</sup> that enters through membrane-transporting proteins such as electrogenic Na<sup>+</sup>/HCO<sub>3</sub><sup>-</sup>-cotransporters (NBCs), anion exchangers or cystic fibrosis transmembrane conductance regulator (CFTR) channels. (f) The entry of HCO<sub>3</sub><sup>-</sup> across transporters, exchangers and channels can potentially be modulated by hormones. (2) sAC in the nucleus may be stimulated by HCO<sub>3</sub><sup>-</sup> derived from all the sources listed above. (3) sAC in the cytoplasm may be stimulated by catalytic metals (e.g. Ca<sup>2+</sup> in mammals), which enter the cell through voltage-dependent Ca<sup>2+</sup> channels (VDCC) or potentially by Ca<sup>2+</sup> released from the endoplasmic reticulum or mitochondria (not depicted). (4) sAC inside mitochondria may be stimulated by metabolically generated CO<sub>2</sub> through CA.

However, the presence of carbonic anhydrase (CA) and A/B ion-transporting proteins may render sAC a *de facto* sensor of intra- and extra-cellular CO<sub>2</sub>, pH and [HCO<sub>3</sub><sup>-</sup>] *in vivo* (Fig. 2). A straightforward mechanism of sAC stimulation involves extracellular HCO<sub>3</sub><sup>-</sup> entering the cell via ion transporter proteins, for example membrane potential-driven electrogenic Na<sup>+</sup>/HCO<sub>3</sub><sup>-</sup> cotransporters (NBCs) in astrocytes (Choi et al., 2012) and probably mammalian epididymis and kidney, or CFTR channels in airway cells (Schmid et al., 2010). Another mechanism is the entry of CO<sub>2</sub> into the cell (by diffusion or possibly across aquaporins), where it is hydrated into HCO<sub>3</sub><sup>-</sup> and H<sup>+</sup> by intracellular CA, as observed in shark gills (Tresguerres et al., 2010c; Tresguerres et al., 2007), and possibly mammalian epididymis (Pastor-Soler et al., 2003) and kidney (Gong et al., 2010; Paunescu et al., 2008). A third source of HCO<sub>3</sub><sup>-</sup> is CO<sub>2</sub> from mitochondrial aerobic respiration, which, after CA-catalyzed hydration into HCO<sub>3</sub><sup>-</sup>, may stimulate sAC inside mitochondria (Acin-Perez et al., 2009) or in the cytoplasm (Tresguerres et al., 2010b). Additional mechanisms for sAC stimulation may be more complex. For example, sAC in mammalian epididymis responds to physiologically relevant variations in extracellular pH from 6.6 to 7.8 in HCO<sub>3</sub><sup>-</sup>-free medium (Pastor-Soler et al., 2003) via an unknown mechanism. And although sAC is not directly modulated by hormones, the mechanisms that load HCO<sub>3</sub><sup>-</sup> into a cell may be. For example, in mouse ovarian granulosa cells, the follicle-stimulating hormone activates CFTR channels [via G-protein-coupled receptor (GPCR)/G-protein/tmAC] leading to HCO<sub>3</sub><sup>-</sup> entry and subsequent sAC stimulation (Chen et al., 2012a). This illustrates a potential, more intricate, mechanism of sAC action that depends on the interplay between cAMP from different sources. Finally, sAC in mammalian INS-1 cells is stimulated by Ca<sup>2+</sup> that enters the cell across voltage-dependent Ca<sup>2+</sup> channels, possibly in conjunction with changes in [HCO<sub>3</sub><sup>-</sup>] and ATP (Ramos et al., 2008).

#### ***In vitro* versus *in vivo* EC<sub>50</sub> for HCO<sub>3</sub><sup>-</sup>**

The *in vitro* EC<sub>50</sub> for HCO<sub>3</sub><sup>-</sup> for purified mammalian and shark sAC protein is close to the normal [HCO<sub>3</sub><sup>-</sup>] in the extracellular fluid of each organism (~20 and ~5 mmol l<sup>-1</sup>, respectively; Table 1). This implies that small changes in [HCO<sub>3</sub><sup>-</sup>] will result in large changes in sAC activity, as the EC<sub>50</sub> is the mean point in the steepest part of the dose–response curve. However, sAC is located inside cells,

where the average [HCO<sub>3</sub><sup>-</sup>] is somewhat lower than in extracellular fluids. For example, normal intracellular [HCO<sub>3</sub><sup>-</sup>] has been reported to be 10–15 mmol l<sup>-1</sup> in mammals (Bettice et al., 1984; Lodish, 1999) and 1–4 mmol l<sup>-1</sup> in fish (Höbe et al., 1984; Strobel et al., 2012; Wood et al., 1990), depending on the species and cell type. Nonetheless, variations in plasma [HCO<sub>3</sub><sup>-</sup>] result in proportional changes in intracellular [HCO<sub>3</sub><sup>-</sup>] during stress conditions (Bettice et al., 1984; Höbe et al., 1984; Strobel et al., 2012; Wood et al., 1990).

There are at least two possible reasons for the small discrepancy between sAC EC<sub>50</sub> for HCO<sub>3</sub><sup>-</sup> and reported intracellular [HCO<sub>3</sub><sup>-</sup>]: (1) EC<sub>50</sub> is estimated using purified sAC protein *in vitro*, which does not necessarily match the conditions inside cells (for example, co-factors); (2) the reported intracellular [HCO<sub>3</sub><sup>-</sup>] values represent an average within whole cells. It is thus possible that focal points inside cells have higher local [HCO<sub>3</sub><sup>-</sup>] due to the proximity to mitochondria or to the action of CAs (e.g. Tresguerres et al., 2006a). In support of this possibility, sAC is more often present in cells that also express abundant intracellular CA (reviewed in Tresguerres et al., 2010a; Tresguerres et al., 2011).

#### **Physiological roles of mammalian sAC**

In the clear cells of the epididymis, sAC is activated by lumen alkalization and triggers compensatory H<sup>+</sup> secretion via apical V-type H<sup>+</sup>-ATPases (Pastor-Soler et al., 2003; Pastor-Soler et al., 2008). Similar roles in A/B sensing and homeostasis have been proposed for sAC in kidney intercalated cells (Gong et al., 2010; Paunescu et al., 2008). sAC also regulates other physiological functions in response to A/B status in diverse mammalian systems such as sperm, eye, airways, pancreas, colon, brain, nervous system, immune cells, bone, embryos and several cell lines. These functions include epithelial ion and fluid transport, sperm flagellar movement, gene expression, development and cell differentiation, ciliary beating in airways and oxidative phosphorylation in mitochondria (reviewed in Tresguerres et al., 2010a; Tresguerres et al., 2011). At the time of writing, sAC has additionally been shown to regulate the metabolic coupling between neurons and astrocytes (Choi et al., 2012), intraocular pressure (Lee et al., 2011), survival of retinal ganglion cells and axon growth (Corredor et al., 2012), aromatase gene expression and estradiol production (Chen et al., 2012a), pathologic activation of proteases in pancreatic acinar cells



**Table 1. Summary of currently described properties of sAC in marine organisms**

| Organism (protein accession no.)                                                                                                 | Co-factors                                                                            | HCO <sub>3</sub> <sup>-</sup> EC <sub>50</sub> (mmol l <sup>-1</sup> ) | pH sensitivity   | Tissue distribution                                                                                                                                              | Notes                                                                                                                                                                                                                                                                                                                                                     |
|----------------------------------------------------------------------------------------------------------------------------------|---------------------------------------------------------------------------------------|------------------------------------------------------------------------|------------------|------------------------------------------------------------------------------------------------------------------------------------------------------------------|-----------------------------------------------------------------------------------------------------------------------------------------------------------------------------------------------------------------------------------------------------------------------------------------------------------------------------------------------------------|
| Mammals<br><i>Homo sapiens</i><br>(NP_060887.2); <i>Rattus</i><br><i>sp.</i> (NP_067716.1)                                       | Mn <sup>2+</sup> † <sup>A</sup><br>Mg <sup>2+</sup> + Ca <sup>2+</sup> * <sup>B</sup> | ~11–25 <sup>B-D</sup>                                                  | No <sup>D</sup>  | Testes, eye, airways,<br>pancreas, colon, brain,<br>nervous system, immune<br>cells, bone, embryos,<br>muscle, kidney, epididymis<br>(reviewed in <sup>E</sup> ) | K <sub>m</sub> for ATP=1–3 mmol l <sup>-1</sup> <sup>B-D</sup><br>Multiple splice variants <sup>F</sup><br>Present in most (all?) mammals, including<br><i>Orcinus orca</i> (XP_004269766.1), <i>Tursiops</i><br><i>truncatus</i> (XP_004329889), <i>Trichechus</i><br><i>manatus</i> (XP_004384133), <i>Odobenus</i><br><i>rosmarus</i> (XP_004408373.1) |
| Bony fishes<br><i>Opsanus beta</i> , <i>Sparus</i><br><i>aurata</i> (based on<br>heterologous antibodies<br>and pharmacology)    | ND                                                                                    | ND                                                                     | ND               | Intestine <sup>J,K</sup>                                                                                                                                         | Present in <i>Oncorhynchus mykiss</i> (TSA<br>EZ789694.1, EZ814745.1), <i>Salmo salar</i> (5<br>WGS contigs), <i>Lepisosteus oculata</i> (WGS<br>AHAT01020068.1), <i>Latimeria chalumnae</i> (17<br>WGS contigs), <i>Latimeria menadoensis</i> (TSA<br>GAPS01010686.1)                                                                                    |
| Cartilaginous fishes<br><i>Squalus acanthias</i><br>(ACA52542.1)                                                                 | Mn <sup>2+</sup> †<br>Mg <sup>2+</sup> + Mn <sup>2+</sup> * <sup>G</sup>              | ~5 <sup>G</sup>                                                        | No <sup>G</sup>  | Gill <sup>G</sup> , rectal gland, red blood<br>cells <sup>H</sup>                                                                                                | Present in <i>Leucoraja erinacea</i> (15 WGS<br>contigs), <i>Triakis semifasciata</i> and <i>Urbatis</i><br><i>halleri</i> gill, rectal gland, testes, muscle, eye,<br>intestine (heterologous antibodies) <sup>I</sup><br><i>Callorhynchus milii</i> (WGS AAVX02006506.1)                                                                                |
| Sea urchin<br><i>Strongylocentrotus</i><br><i>purpuratus</i><br>(NP_001020380.1)                                                 | Mn <sup>2+</sup> † <sup>L</sup><br>Mg <sup>2+</sup> * <sup>M</sup>                    | 20 <sup>K</sup>                                                        | Yes <sup>L</sup> | Sperm <sup>L-N</sup> , embryonic primary<br>mesenchymal cells <sup>O</sup>                                                                                       | Kinetics determined from semi-purified native<br>protein. Present in <i>Patiria miniata</i> (WGS<br>AKZP01091244.1)                                                                                                                                                                                                                                       |
| Mollusks<br>Oyster <i>Crassostrea gigas</i><br>(EKC32844.1)                                                                      | ND                                                                                    | ND                                                                     | ND               | Mantle, gill, hemocytes <sup>P</sup>                                                                                                                             | Present in <i>Ruditapes philippinarum</i> (TSA<br>JO105222.1) and <i>Lottia gigantea</i> (EST<br>FC684349.1, WGS AMQO01004501.1)                                                                                                                                                                                                                          |
| Cnidarians<br><i>Acropora spp.</i> , <i>Pocillopora</i><br><i>damicornis</i> (based on<br>pharmacology on tissue<br>homogenates) | Mg <sup>2+</sup> <sup>P</sup>                                                         | ~10 <sup>P</sup>                                                       | ND               | Not in symbiotic <i>Symbiodinium</i><br>or mucus <sup>Q</sup>                                                                                                    | Present in <i>Acropora</i> (aug_v2a.21187.t1,<br>aug_v2a.10515.t1) <sup>R</sup> ; <i>Nematostella vectensis</i><br>(XP_001623318.1)                                                                                                                                                                                                                       |

ND, not determined; TSA, transcriptomic shotgun assembly; WGS, whole genome shotgun database; EST, expressed sequence tag.

Accession numbers are from NCBI unless otherwise noted.

\*Supports HCO<sub>3</sub><sup>-</sup> stimulation; †maximum activity.

Identification of sAC orthologs is based on BLAST searches using the two catalytic domains of dogfish sAC (amino acids 1–485) as the query. Also present in Poriferans (*Amphimedon queenslandica* XP\_003384443.1); Placozoans (*Trichoplax adherens* XP\_002117857.1); Hemichordates (*Saccoglossus kowalevskii* XP\_002731233); Amphioxus (*Branchiostoma floridae* XP\_002610143.1; XP\_002610144.1)<sup>S</sup>; Tunicates (*Oikopleura dioica* 7 WGS contigs; *Ciona intestinalis* XP\_002121952.1); and reptiles (*Chrysemys picta bellii* XP\_005308389.1, XP\_005314924.1, *Chelonia mydas* EMP34522.1, *Alligator mississippiensis* XP\_006273015.1, *Python morulus* 6 WGS contigs).

<sup>A</sup>Buck et al., 1999; <sup>B</sup>Litvin et al., 2003; <sup>C</sup>Chaloupka et al., 2006; <sup>D</sup>Chen et al., 2000; <sup>E</sup>Tresguerres et al., 2011; <sup>F</sup>see 'Discovery of mammalian sAC' for details; <sup>G</sup>Tresguerres et al., 2010c; <sup>H</sup>this paper; <sup>I</sup>Roa et al., 2012; <sup>J</sup>Carvalho et al., 2012; <sup>K</sup>Tresguerres et al., 2010b; <sup>L</sup>Nomura et al., 2005; <sup>M</sup>Beltran et al., 2007; <sup>N</sup>Bookbinder et al., 1990; <sup>O</sup>Zhu et al., 2001; <sup>P</sup>Barron et al., 2012; <sup>Q</sup>Barott et al., 2013; <sup>R</sup><http://marinegenomics.oist.jp/>; <sup>S</sup>most likely a single protein.

(Kolodecik et al., 2012) and endocytosis of Na<sup>+</sup>/K<sup>+</sup>-ATPase in cultured cells exposed to hypercapnia (Lecuona et al., 2013). Moreover, nuclear sAC has been suggested to determine the aggressiveness of certain skin and prostate cancers (Flacke et al., 2013; Magro et al., 2012a; Magro et al., 2012b; Zippin et al., 2010). In the heart, sAC controls mitochondria-dependent apoptosis in both coronary endothelial cells (Kumar et al., 2009) and cardiomyocytes (Appukuttan et al., 2012) (reviewed in Chen et al., 2012b). Lastly, certain sAC splice variants present in mammalian testis and skeletal muscle have been identified to contain a heme-binding domain (Middelhaufe et al., 2012) of still undefined function.

While many of these functions likely also apply to aquatic organisms (especially vertebrates, e.g. boney and cartilaginous fishes), studies on sAC in aquatic organisms have started only recently, so information is still scarce. The concentration of HCO<sub>3</sub><sup>-</sup> in the internal fluids of aquatic organisms is generally much more variable compared with that of mammals, in terms of both stability and the magnitude of the changes. This has two important implications: (1) the physiological roles of sAC may be more critical in aquatic organisms than in mammals, and (2) studying the physiological roles of sAC may be easier in aquatic organisms than

in mammals because it is possible to experimentally induce more pronounced A/B stress, which may result in responses that are easier to measure.

### sAC in non-mammalian organisms

Mammalian sAC was discovered in the late 1990s (Buck et al., 1999), a few years before the first drafts of the mouse and rat genomes became available. Bioinformatics analyses in the early 2000s revealed sAC orthologs in the slime mold *Dictyostelium* and in cyanobacteria, but not in the fully sequenced genomes of *Drosophila melanogaster*, *Caenorhabditis elegans*, *Arabidopsis thaliana* or *Saccharomyces cerevisiae*. This led to the hypothesis that the sAC gene had been lost in multiple lineages (Roelofs and Van Haastert, 2002). The lack of sAC-related genes in drafts of the zebrafish genome that came out several years later further substantiated the belief that sAC was a mammal-specific A/B sensor, and many even believed it to be a mammalian sperm-specific sensor (see Tresguerres et al., 2011).

This view, however, was upended with the discovery of sAC in sperm from the purple sea urchin *Strongylocentrotus purpuratus* (Nomura et al., 2005), work that relied on traditional protein

purification techniques instead of bioinformatics. A few years later, a sAC ortholog was identified from an EST library from the dogfish shark *Squalus acanthias*, which led to the first characterization of a sAC enzyme from a non-mammalian vertebrate (Tresguerres et al., 2010c). Furthermore, sAC was found to be present and functional in shark gills, demonstrating that sAC is not unique to mammals among animals, nor it is exclusive to sperm.

With the explosion in genomic and transcriptomic information, sAC-related genes can now be found in virtually every animal phylum (Table 1), as well as in other organisms such as diatoms (Matsuda et al., 2011). Although some evidence supports the presence of sAC in plants (Lomovatskaya et al., 2008; Romanenko et al., 2008), even the mere presence of cAMP in plants is controversial and so this topic is not discussed further in this review. BLAST searches of genomes from fruit fly and zebrafish still do not reveal any sAC orthologs; however, sAC genes are found in other insects (e.g. moth, bee, wasp, mosquito) and other fishes (e.g. trout, salmon, gar, coelacanth, chimera, shark, skate). This phylogenetic distribution suggests that either fly and zebrafish sense  $\text{HCO}_3^-$  using fundamentally distinct mechanisms, or that the absence of sAC in these species is due to a glitch of sequencing and annotation techniques.

To date, the only published biochemical reports on non-mammalian sACs are those from the dogfish shark (purified recombinant protein) (Tresguerres et al., 2010c) and from purple sea urchin (semi-purified native protein) (Beltrán et al., 2007; Nomura et al., 2005; Nomura and Vacquier, 2006). Like mammalian sAC, dogfish and sea urchin sAC are stimulated by  $\text{HCO}_3^-$ , potentially stimulated by millimolar concentrations of  $\text{Mn}^{2+}$ , and inhibited by micromolar concentrations of KH7 and derivatives of catechol estrogens. However, unlike mammalian sAC, dogfish and sea urchin sAC are inhibited by millimolar  $\text{Ca}^{2+}$  concentrations. More details about dogfish and sea urchin sAC are described below, as well as reports from marine fish and some information about sAC from other fish, mollusks and coral.

### sAC in sharks and boney fishes

The first two reports of sAC in fish described it as an essential sensor for blood A/B homeostasis in dogfish shark (*Squalus acanthias*) gills (Tresguerres et al., 2010c), and as regulator of NaCl and water absorption in the intestinal epithelium of toadfish (*Opsanus beta*) (Tresguerres et al., 2010b). This latter role was recently confirmed by another research group working with sea bream (*Sparus aurata*) (Carvalho et al., 2012).

Dogfish sAC is ~110 kDa (Tresguerres et al., 2010c), but it is still unclear whether sAC splice variants or isoforms exist in dogfish. Studies using purified recombinant protein comprising the two catalytic domains established that dogfish sAC is stimulated by  $\text{HCO}_3^-$  to produce cAMP with an  $\text{EC}_{50}$  of ~5  $\text{mmol l}^{-1}$ . Like purified mammalian sAC, dogfish sAC is insensitive to physiologically relevant changes in pH (Tresguerres et al., 2010c). Purified dogfish sAC is maximally stimulated by millimolar concentrations of  $\text{Mn}^{2+}$ , while  $\text{HCO}_3^-$  stimulation is supported by a combination of  $\text{Mg}^{2+}$  and  $\text{Mn}^{2+}$ , but neither by  $\text{Mg}^{2+}$  alone nor a combination of  $\text{Mg}^{2+}$  and  $\text{Ca}^{2+}$  (unlike mammalian sAC). The identity of the actual catalytic metals and their concentrations *in vivo* remain to be determined.

The steepest part of the sAC dose–response curve for  $\text{HCO}_3^-$  is between 2 and 15  $\text{mmol l}^{-1}$  (Tresguerres et al., 2010c), which matches the normal  $[\text{HCO}_3^-]$  in dogfish plasma as well as changes in shark plasma  $[\text{HCO}_3^-]$  induced by feeding (metabolic alkalosis) (Wood et al., 2005), by exhaustive exercise (metabolic acidosis) (Richards et al., 2003), in response to hypercapnia (compensatory

metabolic alkalosis) (Heisler, 1988), and by temperature changes (increased  $[\text{HCO}_3^-]$  at higher temperature, and vice versa) (Heisler, 1988). Therefore, sAC is poised to sense the A/B status and trigger physiological responses during these physiologically relevant situations.

The role of sAC as a sensor of A/B status in shark gills has been confirmed through a series of experiments that induced metabolic alkalosis via continuous intravenous infusion of  $\text{NaHCO}_3^-$  (Tresguerres et al., 2005; Tresguerres et al., 2006b; Tresguerres et al., 2010c; Tresguerres et al., 2007). The sAC-dependent mechanism for sensing and counteracting blood alkalosis is summarized in Fig. 3, and is as follows: excess  $\text{HCO}_3^-$  in plasma is dehydrated into  $\text{CO}_2$  by extracellular CA IV located in gill pillar cells (Gilmour et al., 2007).  $\text{CO}_2$  then enters the gill epithelial cells, including the subpopulation that expresses V-type  $\text{H}^+$ -ATPase, intracellular CA and sAC (Tresguerres et al., 2005; Tresguerres et al., 2010c; Tresguerres et al., 2007).  $\text{CO}_2$  is hydrated back into  $\text{H}^+$  and  $\text{HCO}_3^-$ , which stimulates sAC, which in turns triggers the microtubule-dependent translocation of V-type  $\text{H}^+$ -ATPases from cytoplasmic vesicles to the basolateral membrane (Tresguerres et al., 2005; Tresguerres et al., 2006b; Tresguerres et al., 2010c; Tresguerres et al., 2007). This mechanism most likely occurs via PKA-dependent phosphorylation of microtubule motor proteins; however, this has not been experimentally confirmed. The now basolateral V-type  $\text{H}^+$ -ATPases pump intracellular  $\text{H}^+$  into the blood, thus counteracting the alkalosis. At the same time, the excess  $\text{HCO}_3^-$  is secreted across the apical membrane into seawater, most likely via Pendrin-like anion

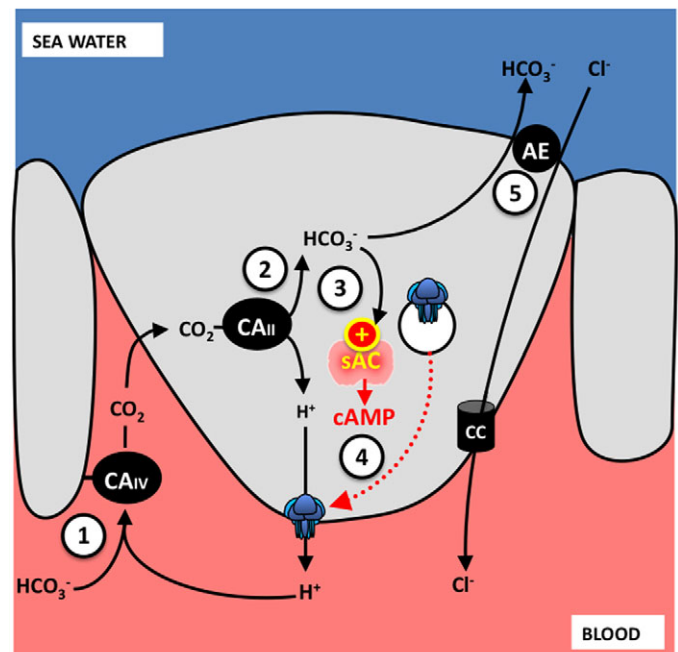

**Fig. 3. sAC-dependent sensing and compensation of blood alkalosis.** During increased blood  $\text{HCO}_3^-$  and pH, (1)  $\text{HCO}_3^-$  in blood is dehydrated into  $\text{CO}_2$  by extracellular carbonic anhydrase (CA<sub>IV</sub>). (2)  $\text{CO}_2$  enters the V-type  $\text{H}^+$ -ATPase-rich cells, where it is hydrated back into  $\text{H}^+$  and  $\text{HCO}_3^-$  by intracellular CA II (CA<sub>II</sub>). (3) The elevated intracellular  $\text{HCO}_3^-$  stimulates sAC to generate cAMP, which triggers the microtubule-dependent translocation of V-type  $\text{H}^+$ -ATPase (blue icon) containing cytoplasmic vesicles to the basolateral membrane. Basolateral V-type  $\text{H}^+$ -ATPase reabsorbs  $\text{H}^+$  into the blood to counteract the original alkalosis. (4) The excess  $\text{HCO}_3^-$  is secreted to seawater in exchange for chloride via a Pendrin-like anion exchanger (AE). Chloride is probably absorbed into the blood across a basolateral channel (CC).

transporters (Piermarini et al., 2002). This process seems to work independently of any hormonal cues, and in theory is self-regulatory: once normal blood  $[\text{HCO}_3^-]$  has been restored, sAC is no longer stimulated, permitting the retrieval of V-type  $\text{H}^+$ -ATPases away from the basolateral membrane.

In the post-feeding period, dogfish gastric cells secrete  $\text{H}^+$  into the stomach (to aid with food digestion), which is matched by equimolar  $\text{HCO}_3^-$  absorption into the blood, resulting in pronounced alkalosis (Wood et al., 2005; Wood et al., 2009). The blood alkalosis is compensated for by an upregulation of branchial  $\text{HCO}_3^-$  secretion and  $\text{H}^+$  absorption across the gills (Wood et al., 2007a), which correlates with significant V-type  $\text{H}^+$ -ATPase translocation in the gill cells (Tresguerres et al., 2007). Altogether, the evidence points to sAC being responsible for sensing post-feeding alkalosis and triggering the A/B compensatory mechanisms. Moreover, sAC is present in most gill epithelial cells and not just in V-type  $\text{H}^+$ -ATPase-rich cells (Tresguerres et al., 2010c), suggesting additional regulatory roles in acid-secreting  $\text{Na}^+/\text{K}^+$ -ATPase-rich cells, pavement cells and pillar cells. Furthermore, as sAC is also present in multiple other shark tissues (Fig. 4) (see also Roa et al., 2012), it is a good candidate to mediate some of the profound metabolic changes that take place throughout the shark's body during the alkalotic post-feeding period (Walsh et al., 2006; Wood et al., 2008), including the stimulation of  $\text{NaCl}$  secretion across the rectal gland (Shuttleworth et al., 2006; Wood et al., 2007b).

The published evidence for sAC presence and activity in teleost fishes is so far limited to immunological detection in toadfish intestine using heterologous antibodies (Tresguerres et al., 2010b) and inhibition of  $\text{NaCl}$  and water absorption in toadfish and sea bream intestine using sAC antagonists (Carvalho et al., 2012; Tresguerres et al., 2010b). The proposed physiological role of sAC in the teleost intestine is to coordinate intestinal carbonate precipitation with  $\text{NaCl}$  and water absorption by modulating the activities of  $\text{Na}^+/\text{K}^+$ -ATPase,  $\text{Na}^+/\text{K}^+/\text{Cl}^-$  cotransporter (NKCC), V-type  $\text{H}^+$ -ATPase and anion exchangers. These processes are essential for osmoregulation of marine teleost fishes (Grosell, 2011; Walsh et al., 1991; Wilson et al., 2009; Wilson et al., 2002).

sAC genes are present in the sequenced genomes or whole genome shotgun (WGS) assemblies of salmon (*Salmo salar*),

chimera (*Callorhynchus milii*), little skate (*Leucoraja erinacea*), coelacanth (*Latimeria chalumnae*) and spotted gar (*Lepiosteus oculatus*), and in transcriptome shotgun assemblies (TSA) of rainbow trout (*Oncorhynchus mykiss*) (Table 1). Further evidence for the ubiquity of sAC in elasmobranchs includes the detection of sAC protein in gill, rectal gland, white muscle, intestine and eye of leopard shark (*Triakis semifasciata*) and round ray (*Urobatis hallerii*) by western blotting using antibodies against dogfish sAC (Roa et al., 2012). We have also detected sAC by RT-PCR in the testis of dogfish shark and rainbow trout (M.T. and J.N.R., unpublished observations), suggesting sAC is important for sperm biology in fishes as it is in mammals. Intriguingly, the initiation of sperm motility depends on cAMP in several fish species (Morisawa and Ishida, 1987; Zilli et al., 2008), and at least in salmonids it is stimulated by  $\text{HCO}_3^-$  (Morisawa and Morisawa, 1988).

#### sAC in sea urchin

Among marine invertebrates, sAC has so far only been characterized in the purple sea urchin, *S. purpuratus*. High levels of AC activity in urchin spermatozoa (Garbers and Kopf, 1980) led to the identification and purification of an AC enzyme by immunoaffinity chromatography (Bookbinder et al., 1990). The 190 kDa protein, which was the first AC to be identified from animal spermatozoa, was not stimulated by forskolin or by G-proteins, and showed high activity in response to  $\text{Mn}^{2+}$ . However, as mammalian sAC would not be discovered until almost a decade later, the sea urchin AC was not identified as a sea urchin sAC and its sensitivity to  $\text{HCO}_3^-$  was not tested at the time. Eventually, analysis of the sea urchin AC sequence indicated it was a homolog of mammalian sAC (Nomura et al., 2005). Compared with mammalian sAC, sea urchin sAC contains multiple amino acid insertions (16–74 amino acids in length) with several potential phosphorylation sites (Nomura et al., 2005).

In the presence of  $\text{Mg}^{2+}$ , partially purified sea urchin sAC is stimulated by  $\text{HCO}_3^-$  with an  $\text{EC}_{50}$  of  $\sim 20 \text{ mmol l}^{-1}$ , and it reaches its maximum at  $50 \text{ mmol l}^{-1}$  (Beltrán et al., 2007). However, these values seem high compared with  $[\text{HCO}_3^-]$  in aquatic invertebrates, raising doubts about the physiological significance of sea urchin sAC. Unlike the pH-insensitive mammalian (Chen et al., 2000) and

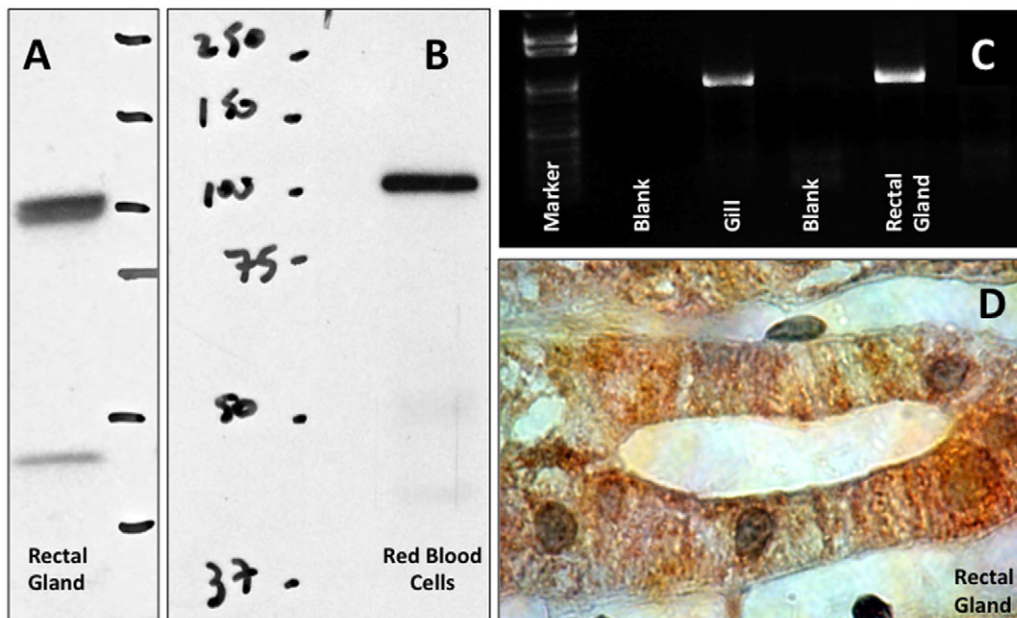

**Fig. 4. Expression of sAC in dogfish shark tissues.** (A,B) sAC protein detected by western immunoblot in rectal gland and red blood cells; the band matches the predicted  $\sim 110 \text{ kDa}$  sAC protein. (C) sAC mRNA detected by RT-PCR in gill (positive control) and rectal gland. (D) Immunolocalization of sAC (brown) in rectal gland cells, showing cytoplasmic and potentially nuclear localization (nuclei stained in green). Methods followed those described previously (Tresguerres et al., 2010c).



dogfish sAC (Tresguerres et al., 2010c), sea urchin sAC displays a steep sensitivity to pH between 7.0 and 7.5 (Beltrán et al., 2007). However, the high  $EC_{50}$  value and pH sensitivity may reflect artifacts of working with semi-purified sea urchin sAC preparations or of not utilizing physiologically relevant assay conditions (e.g. catalytic metals, salts, etc.).

Initial experiments found sea urchin sAC to be concentrated in the proximal half of the sperm flagellum near the mitochondrial midpiece (Bookbinder et al., 1990); this suggested sea urchin sAC triggers the initiation of sperm motility, which depends on cAMP-dependent phosphorylation of flagella-associated proteins (Bracho et al., 1998). Sea urchin sAC is tightly complexed with several proteins of the plasma membrane and axoneme, including dynein heavy chains 7 and 9, sperm-specific  $Na^+/H^+$  exchanger (NHE), cyclic nucleotide-gated ion channel, sperm-specific creatine kinase, membrane-bound guanylyl cyclase, cGMP-specific phosphodiesterase 5A, the receptor for the egg peptide speract, and  $\alpha$ - and  $\beta$ -tubulins (Nomura and Vacquier, 2006). The authors proposed that this complex modulates sperm motility in response to speract and pH changes. Further research using confocal microscopy revealed sea urchin sAC to also be present in the head and acrosomal area (Beltrán et al., 2007). Indeed, sea urchin sAC is important, but not essential, for the sperm acrosome reaction (Beltrán et al., 2007). Searches of EST and TSA databases reveal sea urchin sAC mRNA is also present in embryonic primary mesenchyme cells (Zhu et al., 2001), suggesting various physiological roles in addition to sperm motility and acrosome reaction.

### sAC in mollusks

sAC hits are present in the genome, TSAs and ESTs of the Pacific oyster (*Crassostrea gigas*). Moreover, we have detected sAC mRNA by RT-PCR in mantle, gill and hemocytes, and have observed KH7-sensitive cAMP production in mantle tissue homogenates (Barron et al., 2012). However, the physiological roles of oyster sAC remain unknown. In addition to oysters, other mollusks with readily identifiable sAC orthologs include the Venus clam (*Ruditapes philippinarum*) and the owl limpet (*Lottia gigantea*) (Table 1). The sAC amino acid sequences from these three mollusk species have a serine in the position of the residue suggested to be involved in  $HCO_3^-$  stimulation, which is different from the threonine in sACs from all other animals examined so far, but matches the motifs of  $HCO_3^-$ -sensing bacterial sAC-like enzymes (Linder, 2006; Steegborn et al., 2005b). The implications of these differences are unknown.

In bivalves, pathways involving cAMP have been found or implied to play a role in regulating glycogen breakdown, cilia beating and activation, spawning induction, cardiac contraction, reproduction, mantle and siphon movement, adductor muscle relaxation after the 'catch response', and stress response (reviewed in Fabbri and Capuzzo, 2010). Research on cAMP in bivalves has relied heavily on the use of the biogenic amines 5-HT, dopamine, noradrenaline and adrenaline, which are extracellular ligands for GPCRs (Fabbri and Capuzzo, 2010). As a result, cAMP production in mollusks has been exclusively attributed to the activation of tmACs. However, the literature on cAMP and its physiological responses predates the discovery of sAC in mammals. For example, cAMP production in some bivalve species such as *Mytilus galloprovincialis* and *Tapes philippinarum*, as well as the sea hare, *Aplysia californica*, are unresponsive to, or only slightly stimulated by, forskolin (Mancebo et al., 1991; Valbonesi et al., 2004; Weiss and Drummond, 1985). Although the results of these studies have been explained by attributing activity to orthologs related to the

forskolin-insensitive tmAC IX isoform, orthologs of sAC could supply an alternative, equally plausible, explanation.

Mollusks typically experience many situations associated with increases in the  $[HCO_3^-]$  in their internal fluids, which could lead to stimulation of sAC. For example,  $[HCO_3^-]$  in the hemolymph of the freshwater clam *Anodonta cygnea* rises from 5 to 12  $mmol\ l^{-1}$  on a seasonal basis (Lopes-Lima et al., 2009), and doubles from 3 to 6.5  $mmol\ l^{-1}$  in zebra mussel (*Dreissena polymorpha*) upon transfer from freshwater to brackish water (Byrne and Dietz, 2006). The cuttlefish (*Sepia officinalis*) can accumulate  $HCO_3^-$  in plasma from  $\sim 2\ mmol\ l^{-1}$  to over 10  $mmol\ l^{-1}$  to compensate for environmental hypercapnia (Gutowska et al., 2010); bivalves may also experience significant elevations in hemolymph  $[HCO_3^-]$  in response to ocean acidification (Lannig et al., 2010; Michaelidis et al., 2005b) and exposure to air (Michaelidis et al., 2005a). Although  $HCO_3^-$  accumulation in bivalves in response to hypercapnia is typically much more modest compared with that in active cephalopods, it can still double or in some cases quadruple. Exploring whether sAC plays any physiological role in these situations must start by establishing the sensitivity of mollusk sAC to  $HCO_3^-$ , pH and inhibitors, and by identifying the tissues where it is expressed.

### sAC in corals

We have recently identified two isoforms of sAC in the genome of the coral *Acropora digitifera* (Barott et al., 2013), and sAC is present in at least two other coral species (*A. yongei* and *Stylophora pistillata*; M.T., K.L.B. and M.E.B., unpublished observations), as well as in the genome of the starlet sea anemone *Nematostella vectensis*. Total AC activity in coral tissue homogenates devoid of symbiotic zooxanthellae is among the highest observed from any organism. Indicative of sAC activity, cAMP production in homogenates is significantly stimulated by  $HCO_3^-$  with an apparent  $EC_{50}$  of  $\sim 10\ mmol\ l^{-1}$ , and the  $HCO_3^-$ -stimulated activity is inhibited by  $50\ \mu mol\ l^{-1}$  KH7 (Barott et al., 2013). The  $HCO_3^-$   $EC_{50}$  and the KH7 dose-response of coral sAC need to be determined from kinetic studies using purified protein.

The biological role of sAC in corals remains an outstanding question, but multiple roles are possible, including the regulation of A/B homeostasis, photosynthesis and calcification. Because  $[HCO_3^-]$  in coral tissues ranges from  $\sim 4\ mmol\ l^{-1}$  in the dark to over 100  $mmol\ l^{-1}$  in the light (Furla et al., 2000), coral sAC is likely to be sensitive to physiologically relevant variations in  $[HCO_3^-]$  and most active in the light. Indeed, endogenous cAMP levels in corals *in vivo* are highest in the light (Barott et al., 2013), but whether this is due to sAC activity remains to be determined.

### sAC in other aquatic animals

Table 1 contains a non-exhaustive list of sAC orthologs from other aquatic animals, including those from placozoa (*Trichoplax adherens*), sponge (*Amphimedon queenslandica*), acorn worm (*Saccoglossus kowalevskii*), amphioxus (*Branchiostoma floridae*) and sea squirt (*Ciona intestinalis*). Partial sAC sequences are also identifiable in WGS databases of appendicularia (*Oikopleura dioica*), green sea turtle (*Chelonia mydas*), painted turtle (*Chrysemys picta*) and American alligator (*Alligator mississippiensis*), as well as in snake (*Python morulus*) [which is not an aquatic animal but, like most reptiles and amphibians, undergoes a very pronounced post-feeding blood alkalosis (reviewed in Wang et al., 2001)]. Available sequences for sAC orthologs from marine mammals include those from orca whale (*Orcinus orca*), bottlenose dolphin (*Tursiops truncatus*), manatee (*Trichechus manatus*) and walrus (*Odobenus rosmarus*) (Table 1).

## Need for complementary acid sensor(s)

While the sensory role of sAC during alkalosis is straightforward, its potential function during other A/B stress conditions is more complex. For example, both respiratory acidosis and metabolic alkalosis are characterized by elevated  $P_{CO_2}$  and  $[HCO_3^-]$  and could result in sAC stimulation. However, the homeostatic A/B response to acidosis requires secretion of  $H^+$  and absorption of  $HCO_3^-$ , which is exactly the opposite of the response to alkalosis. To correct for A/B disturbances, cells and organisms must be able to tell the difference between the different types of stress. Both acid- and bicarbonate-secreting cells of shark gills and mammalian kidney express sAC, but how does sAC 'know' which response it should initiate? One potential mechanism involves the integration of inputs from  $HCO_3^-$ -responsive sAC and one or several  $H^+$  sensors (see Brown and Wagner, 2012; Tresguerres et al., 2010a), possibly in combination with differential cell membrane permeability to  $CO_2$  or  $HCO_3^-$ .

## Conclusions

Because of the ubiquity of both  $HCO_3^-$  and cAMP in biological systems, sAC is poised to play multiple important physiological roles as a sensor of A/B stress. The existence of multiple sources of cAMP in different intracellular locations warrants a revisiting of the existing literature, as many of the functions currently ascribed to tmACs may actually depend on sAC.

## Acknowledgements

We appreciate the useful comments by Dr Vic Vacquier (SIO-UCSD), Dr Jochen Buck and Dr Lonny R. Levin (Weill Cornell Medical College).

## Competing interests

The authors declare no competing financial interests.

## Author contributions

All authors wrote the article. M.T. produced the figures, including the data presented in Fig. 4.

## Funding

This work was supported by SIO funds to M.T., National Science Foundation grant EF-1220641 to M.T., National Science Foundation OCE postdoctoral fellowship 1226396 to K.L.B., Scripps Institution of Oceanography Regents and National Science Foundation graduate fellowships to M.E.B., and San Diego Fellowship to J.N.R., who is also partially supported by a National Institutes of Health Training Program in Marine Biotechnology grant. Deposited in PMC for release after 12 months.

## References

- Acin-Perez, R., Salazar, E., Kamenetsky, M., Buck, J., Levin, L. R. and Manfredi, G. (2009). Cyclic AMP produced inside mitochondria regulates oxidative phosphorylation. *Cell Metab.* **9**, 265-276.
- Appukuttan, A., Kasseckert, S. A., Micoogullari, M., Flacke, J.-P., Kumar, S., Woste, A., Abdallah, Y., Pott, L., Reusch, H. P. and Ladilov, Y. (2012). Type 10 adenylyl cyclase mediates mitochondrial Bax translocation and apoptosis of adult rat cardiomyocytes under simulated ischaemia/reperfusion. *Cardiovasc. Res.* **93**, 340-349.
- Barrott, K. L., Helman, Y., Haramaty, L., Barron, M. E., Hess, K. C., Buck, J., Levin, L. R. and Tresguerres, M. (2013). High adenylyl cyclase activity and in vivo cAMP fluctuations in corals suggest central physiological role. *Sci Rep* **3**, 1379.
- Barron, M. E., Roa, J. N. B. and Tresguerres, M. (2012). Pacific oyster mantle, gill and hemocytes express the bicarbonate-sensing enzyme soluble adenylyl cyclase. *FASEB J.* **26**, 1070.2.
- Beltrán, C., Vacquier, V. D., Moy, G., Chen, Y., Buck, J., Levin, L. R. and Darszon, A. (2007). Particulate and soluble adenylyl cyclases participate in the sperm acrosome reaction. *Biochem. Biophys. Res. Commun.* **358**, 1128-1135.
- Bettice, J. A., Owens, D. and Riley, S. (1984). The effects of hypocapnia on intracellular pH and bicarbonate. *Respir. Physiol.* **55**, 121-130.
- Bookbinder, L. H., Moy, G. W. and Vacquier, V. D. (1990). Identification of sea urchin sperm adenylyl cyclase. *J. Cell Biol.* **111**, 1859-1866.
- Bracho, G. E., Fritch, J. J. and Tash, J. S. (1998). Identification of flagellar proteins that initiate the activation of sperm motility in vivo. *Biochem. Biophys. Res. Commun.* **242**, 231-237.
- Braun, T. (1974). Evidence for multiple, cell specific, distinctive adenylyl cyclase systems in rat testis. *Curr. Top. Mol. Endocrinol.* **1**, 243-264.
- Braun, T. (1975). The effect of divalent cations on bovine spermatozoal adenylyl cyclase activity. *J. Cyclic Nucleotide Res.* **1**, 271-281.
- Braun, T. (1990). Inhibition of the soluble form of testis adenylyl cyclase by catechol estrogens and other catechols. *Proc. Soc. Exp. Biol. Med.* **194**, 58-63.
- Braun, T. (1991). Purification of soluble form of adenylyl cyclase from testes. *Methods Enzymol.* **195**, 130-136.
- Braun, T. and Dods, R. F. (1975). Development of a  $Mn^{2+}$ -sensitive, 'soluble' adenylyl cyclase in rat testis. *Proc. Natl. Acad. Sci. USA* **72**, 1097-1101.
- Brown, D. and Wagner, C. A. (2012). Molecular mechanisms of acid-base sensing by the kidney. *J. Am. Soc. Nephrol.* **23**, 774-780.
- Buck, J., Sinclair, M. L., Schapal, L., Cann, M. J. and Levin, L. R. (1999). Cytosolic adenylyl cyclase defines a unique signaling molecule in mammals. *Proc. Natl. Acad. Sci. USA* **96**, 79-84.
- Byrne, R. A. and Dietz, T. H. (2006). Ionic and acid-base consequences of exposure to increased salinity in the zebra mussel, *Dreissena polymorpha*. *Biol. Bull.* **211**, 66-75.
- Carvalho, E. S., Gregório, S. F., Power, D. M., Canário, A. V. and Fuentes, J. (2012). Water absorption and bicarbonate secretion in the intestine of the sea bream are regulated by transmembrane and soluble adenylyl cyclase stimulation. *J. Comp. Physiol. B* **182**, 1069-1080.
- Chaloupka, J. A., Bullock, S. A., Iourgenko, V., Levin, L. R. and Buck, J. (2006). Autoinhibitory regulation of soluble adenylyl cyclase. *Mol. Reprod. Dev.* **73**, 361-368.
- Chen, Y., Cann, M. J., Litvin, T. N., Iourgenko, V., Sinclair, M. L., Levin, L. R. and Buck, J. (2000). Soluble adenylyl cyclase as an evolutionary conserved bicarbonate sensor. *Science* **289**, 625-628.
- Chen, H., Guo, J. H., Lu, Y. C., Ding, G. L., Yu, M. K., Tsang, L. L., Fok, K. L., Liu, X. M., Zhang, X. H., Chung, Y. W. et al. (2012a). Impaired CFTR-dependent amplification of FSH-stimulated estrogen production in cystic fibrosis and PCOS. *J. Clin. Endocrinol. Metab.* **97**, 923-932.
- Chen, J., Levin, L. R. and Buck, J. (2012b). Role of soluble adenylyl cyclase in the heart. *Am. J. Physiol.* **302**, H538-H543.
- Choi, H. B., Gordon, G. R. J., Zhou, N., Tai, C., Rungta, R. L., Martinez, J., Milner, T. A., Ryu, J. K., McLarnon, J. G., Tresguerres, M. et al. (2012). Metabolic communication between astrocytes and neurons via bicarbonate-responsive soluble adenylyl cyclase. *Neuron* **75**, 1094-1104.
- Cooper, D. M. (2003). Regulation and organization of adenylyl cyclases and cAMP. *Biochem. J.* **375**, 517-529.
- Corredor, R. G., Trakhtenberg, E. F., Pita-Thomas, W., Jin, X., Hu, Y. and Goldberg, J. L. (2012). Soluble adenylyl cyclase activity is necessary for retinal ganglion cell survival and axon growth. *J. Neurosci.* **32**, 7734-7744.
- Fabrizi, E. and Capuzzo, A. (2010). Cyclic AMP signaling in bivalve molluscs: an overview. *J. Exp. Zool. A* **313**, 179-200.
- Farrell, J., Ramos, L., Tresguerres, M., Kamenetsky, M., Levin, L. R. and Buck, J. (2008). Somatic 'soluble' adenylyl cyclase isoforms are unaffected in *Sacym<sup>tm1Lex</sup>Sacym<sup>tm1Lex</sup>* 'knockout' mice. *PLoS ONE* **3**, e3251.
- Flacke, J. P., Kempkes, H., Appukuttan, A., Palisaar, R. J., Noldus, J., Robinson, B. D., Reusch, H. P., Zippin, J. H. and Ladilov, Y. (2013). Type 10 soluble adenylyl cyclase is overexpressed in prostate carcinoma and controls proliferation of prostate cancer cells. *J. Biol. Chem.* **288**, 3126-3135.
- Furla, P., Galgani, I., Durand, I. and Allemand, D. (2000). Sources and mechanisms of inorganic carbon transport for coral calcification and photosynthesis. *J. Exp. Biol.* **203**, 3445-3457.
- Garbers, D. L. and Kopf, G. S. (1980). The regulation of spermatozoa by calcium cyclic nucleotides. *Adv. Cyclic Nucleotide Res.* **13**, 251-306.
- Geng, W., Wang, Z., Zhang, J., Reed, B. Y., Pak, C. Y. and Moe, O. W. (2005). Cloning and characterization of the human soluble adenylyl cyclase. *Am. J. Physiol.* **288**, C1305-C1316.
- Gilmour, K. M., Bayaa, M., Kenney, L., McNeill, B. and Perry, S. F. (2007). Type IV carbonic anhydrase is present in the gills of spiny dogfish (*Squalus acanthias*). *Am. J. Physiol.* **292**, R556-R567.
- Gong, F., Alzamora, R., Smolak, C., Li, H., Naveed, S., Neumann, D., Hallows, K. R. and Pastor-Soler, N. M. (2010). Vacuolar  $H^+$ -ATPase apical accumulation in kidney intercalated cells is regulated by PKA and AMP-activated protein kinase. *Am. J. Physiol.* **298**, F1162-F1169.
- Grosell, M. (2011). Intestinal anion exchange in marine teleosts is involved in osmoregulation and contributes to the oceanic inorganic carbon cycle. *Acta Physiol. (Oxf.)* **202**, 421-434.
- Guillou, J. L., Nakata, H. and Cooper, D. M. (1999). Inhibition by calcium of mammalian adenylyl cyclases. *J. Biol. Chem.* **274**, 35539-35545.
- Gutowska, M. A., Melzner, F., Langenbuch, M., Bock, C., Claireaux, G. and Pörtner, H. O. (2010). Acid-base regulatory ability of the cephalopod (*Sepia officinalis*) in response to environmental hypercapnia. *J. Comp. Physiol. B* **180**, 323-335.
- Hanoune, J. and Defer, N. (2001). Regulation and role of adenylyl cyclase isoforms. *Annu. Rev. Pharmacol. Toxicol.* **41**, 145-174.
- Heisler, N. (1988). Acid-base regulation. In *Physiology of Elasmobranch Fishes* (ed. T. J. Shuttleworth), pp. 215-252. Berlin: Springer-Verlag.
- Hess, K. C., Jones, B. H., Marquez, B., Chen, Y., Ord, T. S., Kamenetsky, M., Miyamoto, C., Zippin, J. H., Kopf, G. S., Suarez, S. S. et al. (2005). The 'soluble' adenylyl cyclase in sperm mediates multiple signaling events required for fertilization. *Dev. Cell* **9**, 249-259.
- Höbe, H., Wood, C. M. and Wheatly, M. G. (1984). The mechanisms of acid-base and ionoregulation in the freshwater rainbow trout during environmental hyperoxia and subsequent normoxia. I. Extra- and intracellular acid-base status. *Respir. Physiol.* **55**, 139-154.



- Jaiswal, B. S. and Conti, M. (2001). Identification and functional analysis of splice variants of the germ cell soluble adenylyl cyclase. *J. Biol. Chem.* **276**, 31698-31708.
- Jaiswal, B. S. and Conti, M. (2003). Calcium regulation of the soluble adenylyl cyclase expressed in mammalian spermatozoa. *Proc. Natl. Acad. Sci. USA* **100**, 10676-10681.
- Kamenetsky, M., Middelhaufe, S., Bank, E. M., Levin, L. R., Buck, J. and Steegborn, C. (2006). Molecular details of cAMP generation in mammalian cells: a tale of two systems. *J. Mol. Biol.* **362**, 623-639.
- Kolodcick, T. R., Shugrue, C. A., Thrower, E. C., Levin, L. R., Buck, J. and Gorelick, F. S. (2012). Activation of soluble adenylyl cyclase protects against secretagogue stimulated zymogen activation in rat pancreatic acinar cells. *PLoS ONE* **7**, e41320.
- Kumar, S., Kostin, S., Flacke, J. P., Reusch, H. P. and Ladilov, Y. (2009). Soluble adenylyl cyclase controls mitochondria-dependent apoptosis in coronary endothelial cells. *J. Biol. Chem.* **284**, 14760-14768.
- Lannig, G., Eilers, S., Pörtner, H. O., Sokolova, I. M. and Bock, C. (2010). Impact of ocean acidification on energy metabolism of oyster, *Crassostrea gigas* – changes in metabolic pathways and thermal response. *Mar. Drugs* **8**, 2318-2339.
- Lecuona, E., Sun, H., Chen, J., Trejo, H. E., Baker, M. A. and Sznajder, J. I. (2013). PKA I $\alpha$  regulates Na,K-ATPase endocytosis in alveolar epithelial cells exposed to high CO<sub>2</sub> levels. *Am. J. Respir. Cell Mol. Biol.* **48**, 626-634.
- Lee, Y. S., Tresguerres, M., Hess, K., Marmorstein, L. Y., Levin, L. R., Buck, J. and Marmorstein, A. D. (2011). Regulation of anterior chamber drainage by bicarbonate-sensitive soluble adenylyl cyclase in the ciliary body. *J. Biol. Chem.* **286**, 41353-41358.
- Linder, J. U. (2006). Class III adenylyl cyclases: molecular mechanisms of catalysis and regulation. *Cell. Mol. Life Sci.* **63**, 1736-1751.
- Linder, J. U. and Schultz, J. E. (2008). Versatility of signal transduction encoded in dimeric adenylyl cyclases. *Curr. Opin. Struct. Biol.* **18**, 667-672.
- Litvin, T. N., Kamenetsky, M., Zariifan, A., Buck, J. and Levin, L. R. (2003). Kinetic properties of 'soluble' adenylyl cyclase. Synergism between calcium and bicarbonate. *J. Biol. Chem.* **278**, 15922-15926.
- Lodish, H. F. (1999). *Molecular Cell Biology*. New York, NY: Scientific American Books.
- Lomovatskaya, L. A., Romanenko, A. S., Filinova, N. V. and Salyaev, R. K. (2008). Detection of soluble adenylyl cyclase isoforms in plants. *Dokl. Biochem. Biophys.* **420**, 124-126.
- Lopes-Lima, M., Lopes, A., Casaca, P., Nogueira, I., Checa, A. and Machado, J. (2009). Seasonal variations of pH, pCO<sub>2</sub>, pO<sub>2</sub>, HCO<sub>3</sub><sup>-</sup> and Ca<sup>2+</sup> in the haemolymph: implications on the calcification physiology in *Anodonta cygnea*. *J. Comp. Physiol. B* **179**, 279-286.
- Magro, C. M., Crowson, A. N., Desman, G. and Zippin, J. H. (2012a). Soluble adenylyl cyclase antibody profile as a diagnostic adjunct in the assessment of pigmented lesions. *Arch. Dermatol.* **148**, 335-344.
- Magro, C. M., Yang, S.-E., Zippin, J. H. and Zembowicz, A. (2012b). Expression of soluble adenylyl cyclase in lentigo maligna: use of immunohistochemistry with anti-soluble adenylyl cyclase antibody (R21) in diagnosis of lentigo maligna and assessment of margins. *Arch. Pathol. Lab. Med.* **136**, 1558-1564.
- Mancebo, M., Treviño, M., Crespo, C. and Espinosa, J. (1991). Adenylate cyclase activity in *Mytilus galloprovincialis* Lmk: characteristics of the enzyme from mantle tissue. *J. Exp. Zool. A* **258**, 174-180.
- Matsuda, Y., Nakajima, K. and Tachibana, M. (2011). Recent progresses on the genetic basis of the regulation of CO<sub>2</sub> acquisition systems in response to CO<sub>2</sub> concentration. *Photosynth. Res.* **109**, 191-203.
- Michaelidis, B., Haas, D. and Grieshaber, M. K. (2005a). Extracellular and intracellular acid-base status with regard to the energy metabolism in the oyster *Crassostrea gigas* during exposure to air. *Physiol. Biochem. Zool.* **78**, 373-383.
- Michaelidis, B., Ouzounis, C., Paleras, A. and Portner, H. O. (2005b). Effects of long-term moderate hypercapnia on acid-base balance and growth rate in marine mussels *Mytilus galloprovincialis*. *Mar. Ecol. Prog. Ser.* **293**, 109-118.
- Middelhaufe, S., Leipelt, M., Levin, L. R., Buck, J. and Steegborn, C. (2012). Identification of a haem domain in human soluble adenylate cyclase. *Biosci. Rep.* **32**, 491-499.
- Moore, S. W., Lai Wing Sun, K., Xie, F., Barker, P. A., Conti, M. and Kennedy, T. E. (2008). Soluble adenylyl cyclase is not required for axon guidance to netrin-1. *J. Neurosci.* **28**, 3920-3924.
- Morisawa, M. and Ishida, K. (1987). Short-term changes in levels of cyclic AMP, adenylate cyclase, and phosphodiesterase during the initiation of sperm motility in rainbow trout. *J. Exp. Zool.* **242**, 199-204.
- Morisawa, S. and Morisawa, M. (1988). Induction of potential for sperm motility by bicarbonate and pH in rainbow trout and chum salmon. *J. Exp. Biol.* **136**, 13-22.
- Nomura, M. and Vacquier, V. D. (2006). Proteins associated with soluble adenylyl cyclase in sea urchin sperm flagella. *Cell Motil. Cytoskeleton* **63**, 582-590.
- Nomura, M., Beltrán, C., Darszon, A. and Vacquier, V. D. (2005). A soluble adenylyl cyclase from sea urchin spermatozoa. *Gene* **353**, 231-238.
- Pastor-Soler, N., Beaulieu, V., Litvin, T. N., Da Silva, N., Chen, Y., Brown, D., Buck, J., Levin, L. R. and Breton, S. (2003). Bicarbonate-regulated adenylyl cyclase (sAC) is a sensor that regulates pH-dependent V-ATPase recycling. *J. Biol. Chem.* **278**, 49523-49529.
- Pastor-Soler, N. M., Hallows, K. R., Smolak, C., Gong, F., Brown, D. and Breton, S. (2008). Alkaline pH- and cAMP-induced V-ATPase membrane accumulation is mediated by protein kinase A in epididymal clear cells. *Am. J. Physiol.* **294**, C488-C494.
- Paunescu, T. G., Da Silva, N., Russo, L. M., McKee, M., Lu, H. A., Breton, S. and Brown, D. (2008). Association of soluble adenylyl cyclase with the V-ATPase in renal epithelial cells. *Am. J. Physiol.* **294**, F130-F138.
- Piermarini, P. M., Verlander, J. W., Royaux, I. E. and Evans, D. H. (2002). Pendrin immunoreactivity in the gill epithelium of a euryhaline elasmobranch. *Am. J. Physiol.* **283**, R983-R992.
- Ramos, L. S., Zippin, J. H., Kamenetsky, M., Buck, J. and Levin, L. R. (2008). Glucose and GLP-1 stimulate cAMP production via distinct adenylyl cyclases in INS-1E insulinoma cells. *J. Gen. Physiol.* **132**, 329-338.
- Richards, J. G., Heigenhauser, G. J. F. and Wood, C. M. (2003). Exercise and recovery metabolism in the Pacific spiny dogfish (*Squalus acanthias*). *J. Comp. Physiol. B* **173**, 463-474.
- Roa, J. N. B., Barron, M. E. and Tresguerres, M. (2012). Bicarbonate-sensing soluble adenylyl cyclase in elasmobranch and teleost fishes. *FASEB J.* **26**, 442-447.
- Roelofs, J. and Van Haastert, P. J. (2002). Deducing the origin of soluble adenylyl cyclase, a gene lost in multiple lineages. *Mol. Biol. Evol.* **19**, 2239-2246.
- Romanenko, A. S., Lomovatskaya, L. A., Filinova, N. V., Kopytchuk, V. N. and Salyaev, R. K. (2008). Intracellular localization of 'soluble' adenylate cyclase in potato plants. *Doklady Biological Sciences* **422**, 328-329.
- Schmid, A., Sutto, Z., Schmid, N., Novak, L., Ivonnet, P., Horvath, G., Conner, G., Fregien, N. and Salathe, M. (2010). Decreased soluble adenylyl cyclase activity in cystic fibrosis is related to defective apical bicarbonate exchange and affects ciliary beat frequency regulation. *J. Biol. Chem.* **285**, 29998-30007.
- Seamon, K. B. and Daly, J. W. (1981). Forskolin: a unique diterpene activator of cyclic AMP-generating systems. *J. Cyclic Nucleotide Res.* **7**, 201-224.
- Seamon, K. B., Padgett, W. and Daly, J. W. (1981). Forskolin: unique diterpene activator of adenylate cyclase in membranes and in intact cells. *Proc. Natl. Acad. Sci. USA* **78**, 3363-3367.
- Shuttleworth, T. J., Thompson, J., Munger, R. S. and Wood, C. M. (2006). A critical analysis of carbonic anhydrase function, respiratory gas exchange, and the acid-base control of secretion in the rectal gland of *Squalus acanthias*. *J. Exp. Biol.* **209**, 4701-4716.
- Steegborn, C., Litvin, T. N., Hess, K. C., Capper, A. B., Taussig, R., Buck, J., Levin, L. R. and Wu, H. (2005a). A novel mechanism for adenylyl cyclase inhibition from the crystal structure of its complex with catechol estrogen. *J. Biol. Chem.* **280**, 31754-31759.
- Steegborn, C., Litvin, T. N., Levin, L. R., Buck, J. and Wu, H. (2005b). Bicarbonate activation of adenylyl cyclase via promotion of catalytic active site closure and metal recruitment. *Nat. Struct. Mol. Biol.* **12**, 32-37.
- Strobel, A., Bennecke, S., Leo, E., Mintenbeck, K., Pörtner, H. O. and Mark, F. C. (2012). Metabolic shifts in the Antarctic fish *Notothenia rossii* in response to rising temperature and CO<sub>2</sub>. *Front. Zool.* **9**, 28.
- Tresguerres, M., Katoh, F., Fenton, H., Jasinska, E. and Goss, G. G. (2005). Regulation of branchial V-H<sup>+</sup>-ATPase, Na<sup>+</sup>/K<sup>+</sup>-ATPase and NHE2 in response to acid and base infusions in the Pacific spiny dogfish (*Squalus acanthias*). *J. Exp. Biol.* **208**, 345-354.
- Tresguerres, M., Katoh, F., Orr, E., Parks, S. K. and Goss, G. G. (2006a). Chloride uptake and base secretion in freshwater fish: a transepithelial ion-transport metabolon? *Physiol. Biochem. Zool.* **79**, 981-996.
- Tresguerres, M., Parks, S. K., Katoh, F. and Goss, G. G. (2006b). Microtubule-dependent relocation of branchial V-H<sup>+</sup>-ATPase to the basolateral membrane in the Pacific spiny dogfish (*Squalus acanthias*): a role in base secretion. *J. Exp. Biol.* **209**, 599-609.
- Tresguerres, M., Parks, S. K., Wood, C. M. and Goss, G. G. (2007). V-H<sup>+</sup>-ATPase translocation during blood alkalosis in dogfish gills: interaction with carbonic anhydrase and involvement in the postfeeding alkaline tide. *Am. J. Physiol.* **292**, R2012-R2019.
- Tresguerres, M., Buck, J. and Levin, L. (2010a). Physiological carbon dioxide, bicarbonate, and pH sensing. *Physiol. Biochem. Zool.* **460**, 953-964.
- Tresguerres, M., Levin, L. R., Buck, J. and Grosell, M. (2010b). Modulation of NaCl absorption by [HCO<sub>3</sub><sup>-</sup>] in the marine teleost intestine is mediated by soluble adenylyl cyclase. *Am. J. Physiol.* **299**, R62-R71.
- Tresguerres, M., Parks, S. K., Salazar, E., Levin, L. R., Goss, G. G. and Buck, J. (2010c). Bicarbonate-sensing soluble adenylyl cyclase is an essential sensor for acid/base homeostasis. *Proc. Natl. Acad. Sci. USA* **107**, 442-447.
- Tresguerres, M., Levin, L. R. and Buck, J. (2011). Intracellular cAMP signaling by soluble adenylyl cyclase. *Kidney Int.* **79**, 1277-1288.
- Valbonesi, P., Caselli, F., Capuzzo, A. and Fabbri, E. (2004). Modulation of adenylyl cyclase activity in the gills of *Tapes philippinarum*. *J. Exp. Zool. A* **301**, 952-960.
- Walsh, P. J., Blackwelder, P., Gill, K. A., Danulat, E. and Mommsen, T. P. (1991). Carbonate deposits in marine fish intestines: a new source of biomineralization. *Limnol. Oceanogr.* **36**, 1227-1232.
- Walsh, P. J., Kajimura, M., Mommsen, T. P. and Wood, C. M. (2006). Metabolic organization and effects of feeding on enzyme activities of the dogfish shark (*Squalus acanthias*) rectal gland. *J. Exp. Biol.* **209**, 2929-2938.
- Wang, H. and Storm, D. R. (2003). Calmodulin-regulated adenylyl cyclases: cross-talk and plasticity in the central nervous system. *Mol. Pharmacol.* **63**, 463-468.
- Wang, T., Busk, M. and Overgaard, J. (2001). The respiratory consequences of feeding in amphibians and reptiles. *Comp. Biochem. Physiol.* **128A**, 533-547.
- Weiss, S. and Drummond, G. I. (1985). Biochemical properties of adenylate cyclase in the gill of *Aplysia californica*. *Comp. Biochem. Physiol.* **80B**, 251-255.
- Willoughby, D. and Cooper, D. M. (2007). Organization and Ca<sup>2+</sup> regulation of adenylyl cyclases in cAMP microdomains. *Physiol. Rev.* **87**, 965-1010.
- Wilson, R. W., Wilson, J. M. and Grosell, M. (2002). Intestinal bicarbonate secretion by marine teleost fish – why and how? *Biochim. Biophys. Acta* **1566**, 182-193.

- Wilson, R. W., Millero, F. J., Taylor, J. R., Walsh, P. J., Christensen, V., Jennings, S. and Grosell, M. (2009). Contribution of fish to the marine inorganic carbon cycle. *Science* **323**, 359-362.
- Wong, W. and Scott, J. D. (2004). AKAP signalling complexes: focal points in space and time. *Nat. Rev. Mol. Cell Biol.* **5**, 959-970.
- Wood, C. M., Turner, J. D., Munger, R. S. and Graham, M. S. (1990). Control of ventilation in the hypercapnic skate *Raja ocellata*: II. Cerebrospinal fluid and intracellular pH in the brain and other tissues. *Respir. Physiol.* **80**, 279-297.
- Wood, C. M., Kajimura, M., Mommsen, T. P. and Walsh, P. J. (2005). Alkaline tide and nitrogen conservation after feeding in an elasmobranch (*Squalus acanthias*). *J. Exp. Biol.* **208**, 2693-2705.
- Wood, C. M., Bucking, C., Fitzpatrick, J. and Nadella, S. (2007a). The alkaline tide goes out and the nitrogen stays in after feeding in the dogfish shark, *Squalus acanthias*. *Respir. Physiol. Neurobiol.* **159**, 163-170.
- Wood, C. M., Munger, R. S., Thompson, J. and Shuttleworth, T. J. (2007b). Control of rectal gland secretion by blood acid-base status in the intact dogfish shark (*Squalus acanthias*). *Respir. Physiol. Neurobiol.* **156**, 220-228.
- Wood, C. M., Kajimura, M., Mommsen, T. P. and Walsh, P. J. (2008). Is the alkaline tide a signal to activate metabolic or ionoregulatory enzymes in the dogfish shark (*Squalus acanthias*)? *Physiol. Biochem. Zool.* **81**, 278-287.
- Wood, C. M., Schultz, A. G., Munger, R. S. and Walsh, P. J. (2009). Using omeprazole to link the components of the post-prandial alkaline tide in the spiny dogfish, *Squalus acanthias*. *J. Exp. Biol.* **212**, 684-692.
- Zaccolo, M. (2009). cAMP signal transduction in the heart: understanding spatial control for the development of novel therapeutic strategies. *Br. J. Pharmacol.* **158**, 50-60.
- Zaccolo, M., Di Benedetto, G., Lissandron, V., Mancuso, L., Terrin, A. and Zamparo, I. (2006). Restricted diffusion of a freely diffusible second messenger: mechanisms underlying compartmentalized cAMP signalling. *Biochem. Soc. Trans.* **34**, 495-497.
- Zhu, X., Mahairas, G., Illies, M., Cameron, R. A., Davidson, E. H. and Ettensohn, C. A. (2001). A large-scale analysis of mRNAs expressed by primary mesenchyme cells of the sea urchin embryo. *Development* **128**, 2615-2627.
- Zilli, L., Schiavone, R., Storelli, C. and Vilella, S. (2008). Molecular mechanisms determining sperm motility initiation in two sparids (*Sparus aurata* and *Lithognathus mormyrus*). *Biol. Reprod.* **79**, 356-366.
- Zippin, J. H., Chen, Y., Nahirney, P., Kamenetsky, M., Wuttke, M. S., Fischman, D. A., Levin, L. R. and Buck, J. (2003). Compartmentalization of bicarbonate-sensitive adenylyl cyclase in distinct signaling microdomains. *FASEB J.* **17**, 82-84.
- Zippin, J. H., Farrell, J., Huron, D., Kamenetsky, M., Hess, K. C., Fischman, D. A., Levin, L. R. and Buck, J. (2004). Bicarbonate-responsive 'soluble' adenylyl cyclase defines a nuclear cAMP microdomain. *J. Cell Biol.* **164**, 527-534.
- Zippin, J. H., Chadwick, P. A., Levin, L. R., Buck, J. and Magro, C. M. (2010). Soluble adenylyl cyclase defines a nuclear cAMP microdomain in keratinocyte hyperproliferative skin diseases. *J. Invest. Dermatol.* **130**, 1279-1287.
